# Supplementary material for: An electrochemical approach towards the controllable synthesis of highly ordered and hierarchical zinc oxide dendritic crystals composed of hexagonal nanosheets: some insights into the stacking-assembly of the hierarchical architecture
Source: Royal Society of Chemistry journal article supplement (doi:10.1039/c9ce00342h), 2019-01-01
Supplement: c9ce00342h1.pdf [file c9ce00342h1.pdf]

*Electronic Supplementary Information*

*For*

**Electrochemical approach towards the controllable synthesis of highly ordered and hierarchical zinc oxide dendritic crystal composed of hexagonal nanosheets: some insights into the stacking-assembly of hierarchical architecture**

Yuli Zhou,<sup>a</sup> Jian Wang,<sup>\*a</sup> Hongting Zhou,<sup>b</sup> Fangyu Xiang,<sup>c</sup> Hongyu Yang,<sup>a</sup> Xiaoyao Cai,<sup>b</sup> Huimin Liao,<sup>a</sup> Lin Gao and Yanyan Wang<sup>d</sup>

<sup>a</sup> School of Materials Science and Engineering, Xihua University, Chengdu 610039, People's Republic of China. E-mail: wangjianxhu@163.com (Jian Wang)

<sup>b</sup> School of Mechanical Engineering, Xihua University, Chengdu 610039, People's Republic of China

<sup>c</sup> College of teacher education, Ningbo University, Ningbo 315000, People's Republic of China

<sup>d</sup> School of Optoelectronic Science and Engineering & Collaborative Innovation Center of Suzhou Nano Science and Technology, Soochow University, Suzhou 215006, People's Republic of China

Table S1 Exact values of time, temperature and current of ZnO-s1

| Time (s) | Temperature(°C) | Current (A) |
|----------|-----------------|-------------|
| 60       | 50.2            | 0.1         |
| 120      | 50.7            | 0.11        |
| 180      | 51.3            | 0.12        |
| 240      | 51.8            | 0.13        |
| 300      | 52.3            | 0.14        |
| 360      | 52.9            | 0.15        |
| 420      | 53.4            | 0.155       |
| 480      | 53.8            | 0.16        |
| 540      | 54.2            | 0.17        |
| 600      | 54.8            | 0.175       |
| 660      | 55.4            | 0.18        |
| 720      | 55.7            | 0.185       |
| 780      | 55.9            | 0.19        |
| 840      | 56.2            | 0.2         |
| 900      | 56.4            | 0.205       |
| 960      | 56.9            | 0.21        |
| 1020     | 57.2            | 0.215       |
| 1080     | 57.4            | 0.22        |
| 1140     | 57.8            | 0.224       |
| 1200     | 58.3            | 0.228       |
| 1260     | 58.7            | 0.23        |
| 1320     | 58.8            | 0.234       |
| 1380     | 58.9            | 0.24        |
| 1440     | 59.1            | 0.245       |
| 1500     | 59.3            | 0.25        |
| 1560     | 59.4            | 0.255       |
| 1620     | 59.6            | 0.26        |
| 1680     | 59.7            | 0.265       |
| 1740     | 59.9            | 0.268       |
| 1800     | 59.8            | 0.269       |
| 1860     | 60.6            | 0.378       |
| 1920     | 60.7            | 0.38        |
| 1980     | 60.7            | 0.384       |
| 2040     | 60.8            | 0.39        |
| 2100     | 60.6            | 0.395       |
| 2160     | 60.5            | 0.398       |
| 2220     | 60.7            | 0.399       |
| 2280     | 60.7            | 0.4         |
| 2340     | 60.8            | 0.401       |
| 2400     | 60.8            | 0.4         |

Table S2 Exact values of time, temperature and current of ZnO-s2

| Time (s) | Temperature(°C) | Current (A) |
|----------|-----------------|-------------|
| 60       | 50.2            | 0.21        |
| 120      | 51.5            | 0.23        |
| 180      | 53.2            | 0.25        |
| 240      | 54.3            | 0.27        |
| 300      | 55.4            | 0.33        |
| 360      | 57.4            | 0.34        |
| 420      | 58.3            | 0.36        |
| 480      | 59.7            | 0.38        |
| 540      | 60.2            | 0.4         |
| 600      | 60.8            | 0.41        |
| 660      | 61.4            | 0.44        |
| 720      | 62.6            | 0.46        |
| 780      | 63.7            | 0.47        |
| 840      | 64.5            | 0.49        |
| 900      | 65.3            | 0.51        |
| 960      | 66.4            | 0.53        |
| 1020     | 67.5            | 0.55        |
| 1080     | 68.6            | 0.56        |
| 1140     | 68.9            | 0.58        |
| 1200     | 69.2            | 0.64        |
| 1260     | 69.8            | 0.66        |
| 1320     | 70.3            | 0.67        |
| 1380     | 70.8            | 0.69        |
| 1440     | 71.5            | 0.7         |
| 1500     | 72.6            | 0.72        |
| 1560     | 71.8            | 0.73        |
| 1620     | 72.3            | 0.74        |
| 1680     | 73.2            | 0.75        |
| 1740     | 73.4            | 0.76        |
| 1800     | 73.5            | 0.76        |
| 1860     | 73.8            | 0.78        |
| 1920     | 74.1            | 0.78        |
| 1980     | 74.3            | 0.79        |
| 2040     | 74.5            | 0.8         |
| 2100     | 74.8            | 0.8         |
| 2160     | 75.2            | 0.81        |
| 2220     | 75.3            | 0.82        |
| 2280     | 75.3            | 0.82        |
| 2340     | 75.8            | 0.83        |
| 2400     | 75.9            | 0.84        |
| 2460     | 76.2            | 0.85        |

|      |      |      |
|------|------|------|
| 2520 | 76.4 | 0.84 |
| 2580 | 76.5 | 0.85 |
| 2640 | 76.7 | 0.84 |
| 2700 | 76.8 | 0.85 |
| 2760 | 76.8 | 0.85 |
| 2820 | 76.9 | 0.86 |
| 2880 | 77.5 | 0.86 |
| 2940 | 77.5 | 0.87 |
| 3000 | 77.6 | 0.88 |
| 3060 | 77.6 | 0.88 |
| 3120 | 77.8 | 0.88 |
| 3180 | 77.8 | 0.88 |

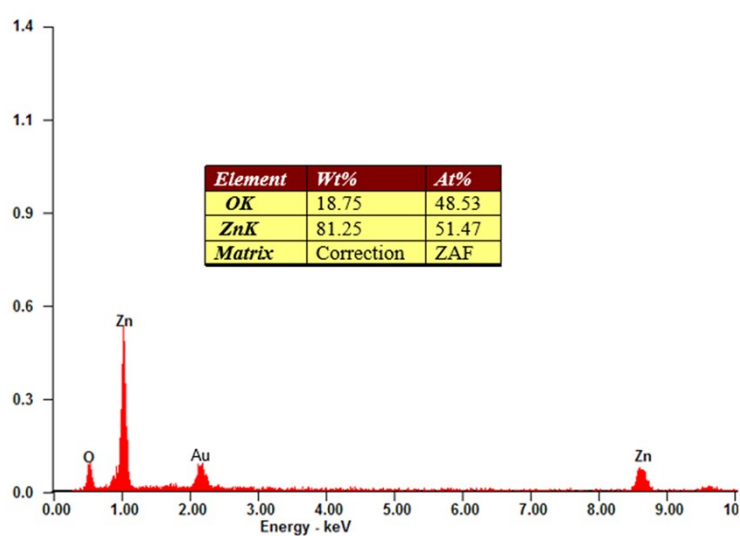

Fig. S1 EDX spectra confirming the Zn and O peaks and, the actual composition of ZnO dendritic crystals.

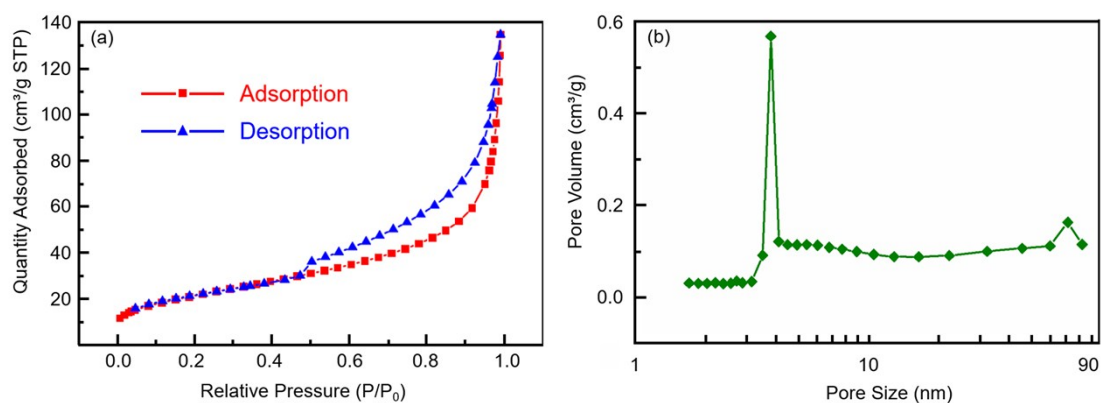

Fig. S2 (a) Nitrogen adsorption-desorption isotherm loop and (b) BJH pore-size distribution of the ZnO dendritic crystals.

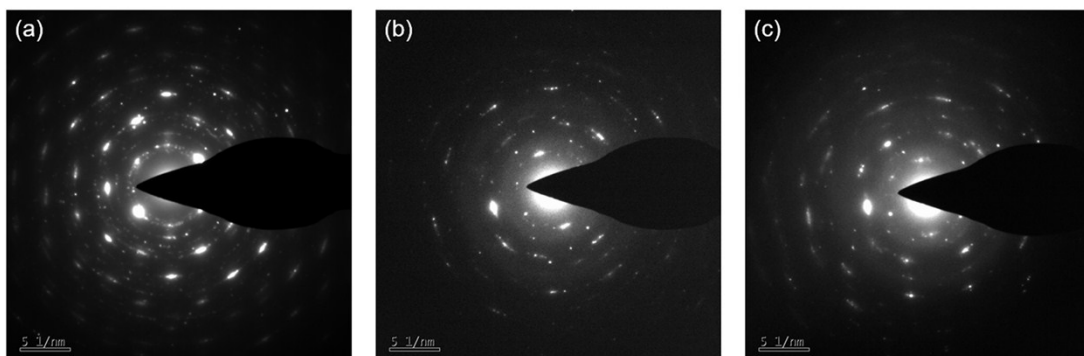

Fig. S3 SAED patterns of the (a) trunk zone, (b) branching zone and (c) growing tip of the hierarchical ZnO dendritic crystal.

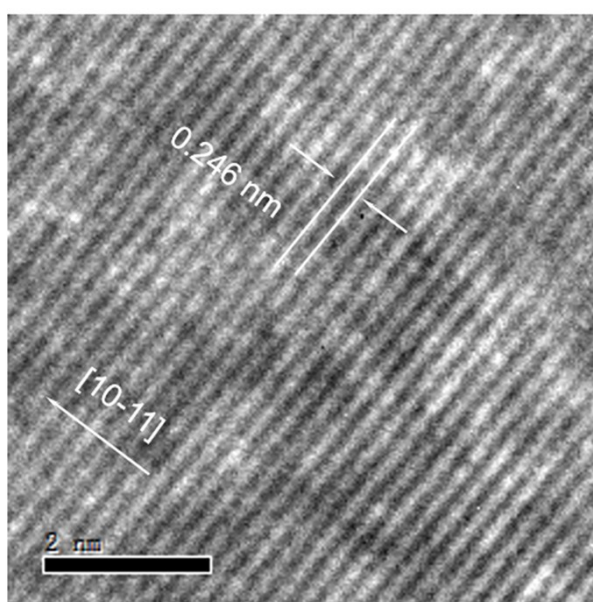

Fig. S4 HRTEM images of (101) plane the hexagonal nanosheet.
